# Supplementary material
Source: publisher site journal article supplement (https://www.spandidos-publications.com/7690/downloadSupplementary)

Figure S1. Immunohistochemical findings of various markers. (A) p63, (B) chromogranin, (C) CD34, (D) p40, (E) CK7, (F) CK8, (G) CK19, (H) HMWCK, (I) Cam5.2, (J) CK20, (K) ER, (L) STAT6, (M) TTF-1, (N) BRAF V600E, (O)  $\beta$ -catenin, (P) TLE-1, (Q) BCL2, (R) CD99, and (S) CD56. All images were obtained at a magnification of x100. CD34, cluster of differentiation 34; p40,  $\Delta$ Np63 isoform of the p63 protein; CK7, cytokeratin 7; CK19, cytokeratin 19; HMWCK, high molecular weight cytokeratin; Cam5.2, anti-cytokeratin antibody; CK20, cytokeratin 20; ER, estrogen receptor; STAT6, signal transducer and activator of transcription 6; TTF-1, thyroid transcription factor-1; BRAF V600E, B-Raf proto-oncogene, serine/threonine kinase, with V600E mutation (Val600Glu); TLE-1, transducin-like enhancer of split 1; BCL2, B-cell lymphoma 2; CD99, cluster of differentiation 99; CD56, cluster of differentiation 56.

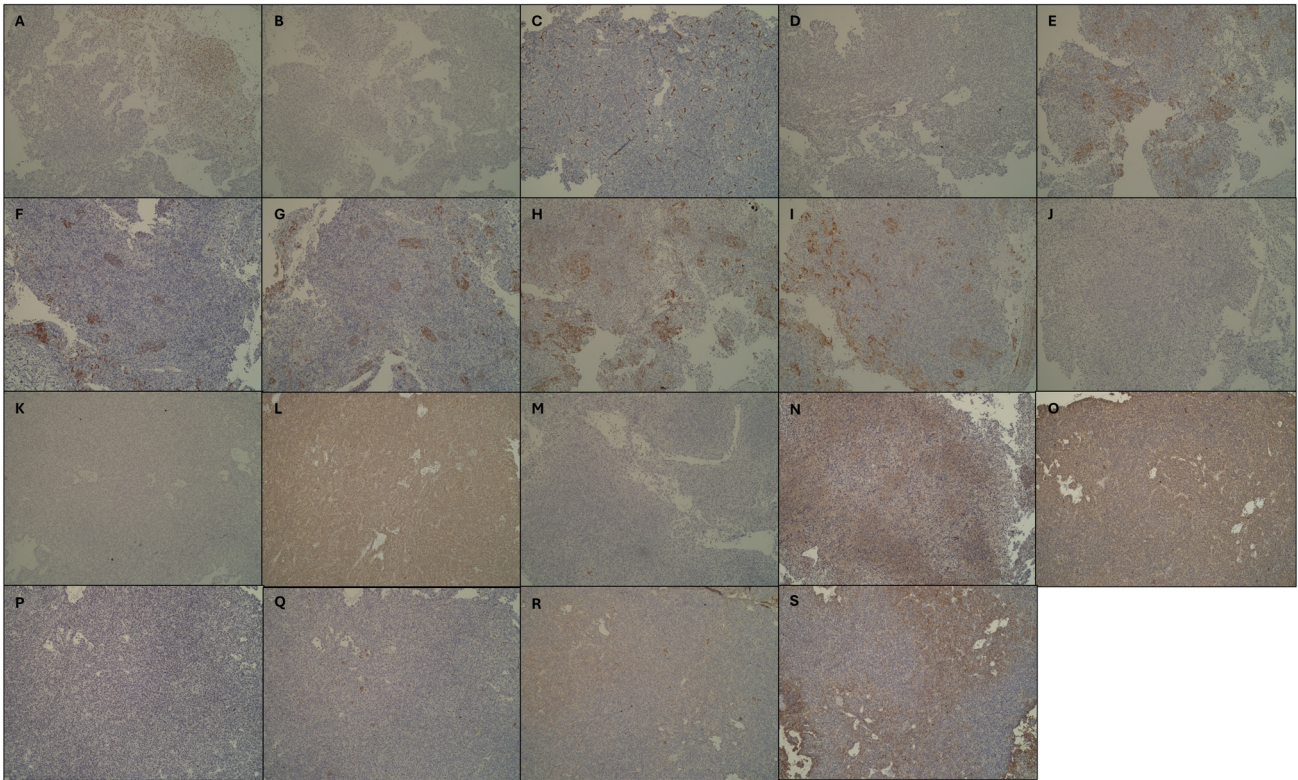

Supplement: Supplementary file 1 [file downloadSupplementary]
